# Supplementary material
Source: Springer Nature journal article supplement (https://www.springermedizin.de/resource/supplementary/12888_2011_957_MOESM2_ESM.pdf/9478654)

◆ Class 1- Least functional impairment (46%)  
 ■ Class 2- Intermediate functional impairment (24%)  
 ▲ Class 3- Most functional impairment and greater psychopathology (30%)

Standardized Mean

SOFI-living situation  
 SOFI-daily living  
 SOFI-productive activity  
 SOFI-social function  
 QLS-common objective  
 QLS-intrapsychic  
 QLS-interpersonal  
 QLS-instrumental role  
 PANSS-negative  
 PANSS-positive  
 PANSS-disorganized thought  
 PANSS- hostility/ excitement  
 PANSS-depression/ anxiety  
 MADRS-depression  
 SWN-K-negative  
 SWN-K-positive  
 BACS-SCT

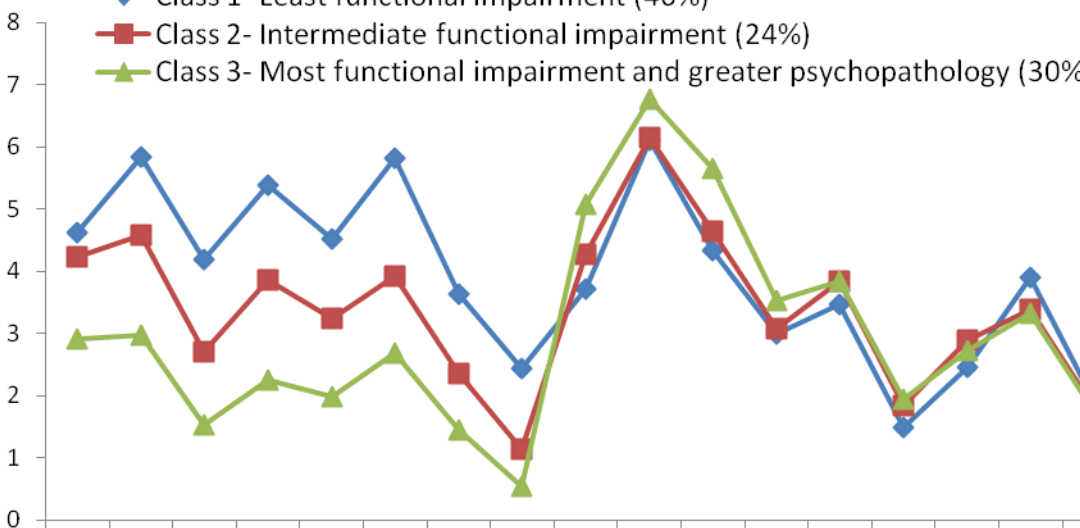

Supplement: MOESM2 [file 9478654]
